# Supplementary material
Source: PubMed Central journal article supplement (PMC8354237)
Supplement: jvi.00399-21-s0001.pdf [file jvi.00399-21-s0001.pdf]

# Supplementary Information

1

2 **Table S1.** dsRNA bacteriophage in family *Cystoviridae*

| Species                      | Genus      | Sequence accession numbers     |
|------------------------------|------------|--------------------------------|
| Pseudomonas phage phi12      | Cystovirus | NC_004173\NC_004175\ NC_004174 |
| Pseudomonas phage phi13      | Cystovirus | NC_004172\NC_004171\ NC_004170 |
| Pseudomonas phage<br>phi2954 | Cystovirus | NC_012091\NC_012092\ NC_012093 |
| Pseudomonas virus phi6       | Cystovirus | NC_003715\NC_003716\ NC_003714 |
| Pseudomonas phage phi8       | Cystovirus | NC_003299\NC_003300\ NC_003301 |
| Pseudomonas phage phiNN      | Cystovirus | NC_042068\NC_042069\ NC_042070 |
| Pseudomonas phage phiYY      | Cystovirus | NC_042071\NC_042072\ NC_042073 |

3

4

5

6

7

8

9

10

11

12

13

14

15

16

17

18

19

20

21

22

23

24

25

26

27

28

29

30

31

**Table S2.** The 16S rDNA sequencing results of *M. aerodenitrificans* strain LH11-4.

| Name | 16S rDNA sequence |            |            |            |            |
|------|-------------------|------------|------------|------------|------------|
|      | 1                 | CACCCCAGTC | ATGAAACCTA | CCGTGGTAAG | CGGGCTCCTT |
|      | 41                | ACGGTTACCC | TACCCACTTC | TGGCGGATTC | CACTCCCATG |
|      | 81                | GTGTGACGGG | CGGTGTGTAC | AAGGCCCGGG | AACGTATTCA |
|      | 121               | CCGCGGCATG | CTGATCCGCG | ATTACTAGCG | ATTCCGACTT |
|      | 161               | CACGCAGTCG | AGTTGCAGAC | TGCGATCCGG | ACTACGATCG |
|      | 201               | GTTTTCTGGG | ATTAGCTTCA | CCTCGCGGCT | TCGCAACCCT |
|      | 241               | CTGTACCGAC | CATTGTATGA | CGTGTGAAGC | CCTACCCATA |
|      | 281               | AGGGCCATGA | GGACTTGACG | TCATCCCCAC | CTTCCTCCGG |
|      | 321               | TTTGTACCG  | GCAGTCCCAT | TAAAGTGCCC | AACTTAATGA |
|      | 361               | TGGCAACTAA | TGGCAAGGGT | TGCGCTCGTT | GCGGGACTTA |
|      | 401               | ACCCAACATC | TCACGACACG | AGCTGACGAC | AGCCATGCAG |
|      | 441               | CACCTGTGCC | CAGGTTCCCT | TTCGGGCACT | CTCCCATCTC |
|      | 481               | CGGGAGATTC | CTGGCATGTC | AAGGGTAGGT | AAGGTCTTTC |
|      | 521               | GCGTTGCATC | GAATTAATCC | ACATCATCCA | CCGCTTGTGC |
|      | 561               | GGGCCCCCGT | CAATTCCTTT | GAGTTTTAAT | CTTGCACCG  |
|      | 601               | TACTCCCCAG | GCGGTCGACT | TCACGCGTTA | GCTGCGCCAC |
|      | 641               | CAAAGACCGA | GGTCTCCAAC | GGTAGTCGA  | CATCGTTTAG |
|      | 681               | GGCGTGGACT | ACCAGGGTAT | CTAATCCTGT | TTGCTCCCCA |
|      | 721               | CGCTTTCGTG | CATGAGCGTC | AGTATCATCC | CAGGGGGCTG |
|      | 761               | CCTTCGCCAT | TGGTGTTCCT | CCACATCTCT | ACGCATTTCA |
|      | 801               | CTGCTACACG | TGGAATTCCA | CCCCCCTCTG | ACGTACTCTA |
|      | 841               | GCGAGACAGT | TTCGGCCGCA | GTTCCCAGGT | TGAGCCCGGG |
|      | 881               | GCTTTCACAG | CTGACTTATC | TCACCGCCTG | CGCACGCTTT |
|      | 921               | ACGCCCAGTA | ATTCCGATTA | ACGCTTGAC  | CCTACGTATT |
|      | 961               | GCCGCGGCTG | CTGGCACGTA | GTTAGCCGGT | GCTTATTCTT |
|      | 1001              | CCGGTACTGT | CAGTCCCGAC | CGCTATTAAC | GATCAGGGTT |
|      | 1041              | TCCTCCCGGA | CAAAAGCCCT | TTACAACCCG | AAGGCCTTCT |
|      | 1081              | TCAGACACGC | GGCATGGCTG | GATCAGGGTT | TCCCCATTG  |
|      | 1121              | TCCAAAATTC | CCCACTGCTG | CCTCCCGTAG | GAGTCTGGGC |
|      | 1161              | CGTGTCTCAG | TCCCAGTGTG | GCGGATCATC | CTCTCAGACC |
|      | 1201              | CGTACGGAT  | CGTCGCCTTG | GTGAGCCTTT | ACCCACCAA  |
|      | 1241              | CTAGCTAATC | CGACATCGGC | CGCTCGATTA | GCGTGAGGCC |
|      | 1281              | TTGCGGTCCC | CCACTTCCC  | CCTCAGGGCG | TATGCGGTAT |
|      | 1321              | TAGCACACCT | TTCGGTGCCT | TATCCCCAC  | TATTCGGCAC |
|      | 1361              | GTTCCGATGC | ATTACTCACC | CGTTCGCCAC | TCGTACGCGG |
|      | 1401              | GAGCAAGCTC | CCCTGTTACC | GTTGACTTGG | CATGTGTAAA |
|      | 1441              | GCATGCCGCC | AGCGTTCAAT |            |            |

*M. aerodenitrificans*  
strain LH11-4.

36 **Table S3.** Primer used in this study.

| Primer        | Sequence (5' to 3')                                                                           | Description           |               |
|---------------|-----------------------------------------------------------------------------------------------|-----------------------|---------------|
| PhiNY-L-5mo-1 | CTCGGGTAGTTACACGGAGGTAAGT                                                                     | <b>5' and 3' RACE</b> |               |
| PhiNY-L-5mo-2 | GCATCACATGATGGCTGAGTCTGAG                                                                     |                       |               |
| PhiNY-L-3mo-1 | GTACGCTACTGAAGCCAGCGTC                                                                        |                       |               |
| PhiNY-L-3mo-2 | GTGTCAAGCAACGCGTGTTCG                                                                         |                       |               |
| PhiNY-L-3mo-3 | GCTGCGTGACCTCCTCACCTAC                                                                        |                       |               |
| PhiNY-M-5mo-1 | CGAGCTTCTCCATATTACTAGCCCTC                                                                    |                       |               |
| PhiNY-M-5mo-2 | CACAAGTACGCAGTCGCCATG                                                                         |                       |               |
| PhiNY-M-5mo-3 | CAAACGCGCATTCTCAGTCGC                                                                         |                       |               |
| PhiNY-M-3mo-1 | GAGCTCGAAGACGTAGCTGAGCG                                                                       |                       |               |
| PhiNY-M-3mo-2 | GATCTCGGTCTTCGTATCGGTCCG                                                                      |                       |               |
| PhiNY-M-3mo-3 | CGGTAAGAGGCAACAAAAGGAAAGG                                                                     |                       |               |
| PhiNY-S-5mo-1 | GACCCGGTAGATTCCGGAACAG                                                                        |                       |               |
| PhiNY-S-5mo-2 | CACGTGGCATGGCTCGAACAAAC                                                                       |                       |               |
| PhiNY-S-5mo-3 | GAGGAAACCCTTGACCTTGTTTCATG                                                                    |                       |               |
| PhiNY-S-3mo-1 | CGAAGTTCAGTCCACTGGAAGCAAC                                                                     |                       |               |
| PhiNY-S-3mo-2 | GTAATGGCGAGTTTCGCCGATTC                                                                       |                       |               |
| PhiNY-S-3mo-3 | GCTGGAACCCGGTACAACATCTTTG                                                                     |                       |               |
| REV-anchor    | GCATTGCATCATGATCGATCGAATTCTTTA<br>GTGAGGGTTAATTGCC<br>(5' end phosphorylated oligonucleotide) |                       |               |
| oligoREV      | GGCAATTAACCCTCACTAAAG                                                                         |                       |               |
| REV-PCR       | TCACTAAAGAATTCGATCGATC                                                                        |                       |               |
| 16S rRNA-F    | AGAGTTTGATCCTGGCTCAG                                                                          | <b>RT-qPCR</b>        |               |
| 16S rRNA-R    | GGTTACCTTGTACGACTT                                                                            |                       |               |
| qL-6-F        | GACATCGCTGACATCGACAGCATAAC                                                                    |                       |               |
| qL-6-R        | GAATACCTCGTTCTTCGGAGGTCAG                                                                     |                       |               |
| qM-5-F        | TGTCCAACGCTTACATCGAACCC                                                                       |                       |               |
| qM-5-R        | CGACATCCTTGACAACCCTGCTC                                                                       |                       |               |
| qS-4-F        | TGGAGTTGAGTTGATGCCCTTTGAT                                                                     |                       |               |
| qS-4-R        | TGGAGCTGTTGATGGGAAGATTGC                                                                      |                       |               |
| phiNY-M-YZ-F1 | CAGTCTGCGAGGTATCAGACTCGTAG                                                                    |                       | <b>RT-PCR</b> |
| phiNY-M-YZ-R1 | GACGGTATCAGCATGATCAGGAACGAC                                                                   |                       |               |

37

38

**Table S4.** Genome length (bp) of different dsRNA phage genomes.

| Segments | phi6  | phi8  | phi12 | phi13 | phi2954 | phiNN | phiYY | phiNY |
|----------|-------|-------|-------|-------|---------|-------|-------|-------|
| L        | 6374  | 7051  | 6751  | 6458  | 6501    | 6503  | 6648  | 7135  |
| M        | 4063  | 4741  | 4100  | 4213  | 3606    | 3814  | 3862  | 3229  |
| S        | 2948  | 3192  | 2322  | 2981  | 2578    | 2945  | 3004  | 2657  |
| Total    | 13385 | 14984 | 13173 | 13652 | 12685   | 13262 | 13514 | 13021 |

**Table S5.** Phage phiNY ORFs annotation results.

| Segment | ORFs  | Nucleotide position | Length<br>(aa) | Mass<br>(Da) | pI    | Best match (aa identity)                  | E-value | Function                              |
|---------|-------|---------------------|----------------|--------------|-------|-------------------------------------------|---------|---------------------------------------|
| L       | orf01 | 284-880             | 198            | 21228        | 7.87  |                                           |         | hypothetical protein                  |
|         | orf02 | 989-1270            | 93             | 10521        | 5.81  |                                           |         | hypothetical protein                  |
|         | orf03 | 1346-1945           | 199            | 21553        | 4.93  |                                           |         | hypothetical protein                  |
|         | orf04 | 2045-3826           | 593            | 67241        | 7.24  | <i>Pseudomonas</i> phage phi2954 (26.17%) | 4.E-50  | RNA-dependent RNA polymerase P2       |
|         | orf05 | 3823-4791           | 322            | 35554        | 4.96  |                                           |         | hypothetical protein                  |
|         | orf06 | 4873-7023           | 716            | 79132        | 6.34  | <i>Pseudomonas</i> phage phi2954 (20.55%) | 2.E-05  | major core structural protein P1      |
| M       | orf07 | 171-356             | 61             | 6947         | 9.88  |                                           |         | hypothetical protein                  |
|         | orf08 | 343-597             | 84             | 8251         | 4.64  |                                           |         | hypothetical protein                  |
|         | orf09 | 587-709             | 40             | 4228         | 9.52  |                                           |         | hypothetical protein                  |
|         | orf10 | 711-1190            | 159            | 16402        | 5.33  |                                           |         | hypothetical protein                  |
|         | orf11 | 1199-2860           | 553            | 61594        | 6.54  |                                           |         | hypothetical protein                  |
|         | orf12 | 2887-3114           | 75             | 8370         | 5.00  |                                           |         | hypothetical protein                  |
| S       | orf13 | 226-26              | 66             | 7716         | 12.00 |                                           |         | hypothetical protein                  |
|         | orf14 | 283-801             | 172            | 18382        | 9.57  |                                           |         | hypothetical protein                  |
|         | orf15 | 801-1376            | 191            | 20162        | 4.56  |                                           |         | hypothetical protein                  |
|         | orf16 | 1379-1630           | 83             | 8689         | 8.18  |                                           |         | hypothetical protein                  |
|         | orf17 | 1644-2564           | 306            | 33088        | 10.24 | <i>Lactobacillus satsumensis</i> (35.42%) | 1.E-12  | glycoside hydrolase family 73 protein |

40

41
